# Supplementary material
Source: HighWire-hosted journal article supplement (http://jneurosci.org/highwire/filestream/600856/field_highwire_adjunct_files/0/Supplemental_Figures.pdf)
Supplement: Supplemental_Figures.pdf [file Supplemental_Figures.pdf]

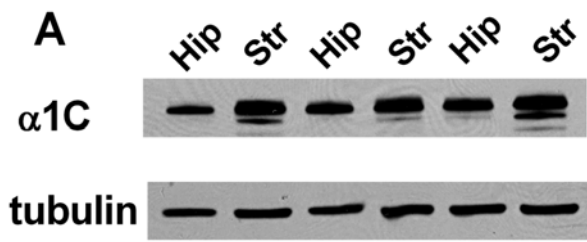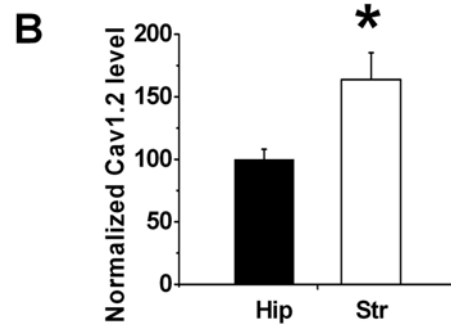

Figure S1. Higher  $\text{Ca}_v1.2$  levels in striatum compared to hippocampus. A. Immunoblots of hippocampal or striatal lysates from one-month old WT mice probed with anti- $\alpha 1C$  antibody.  $\alpha$ -tubulin was used as loading control. B. Quantitative analysis of data in (A),  $\text{Ca}_v1.2$  level was significantly higher (\* $p < 0.05$ ) in striatum compared to hippocampus. Each value represents the mean  $\pm$  SEM (N=3).

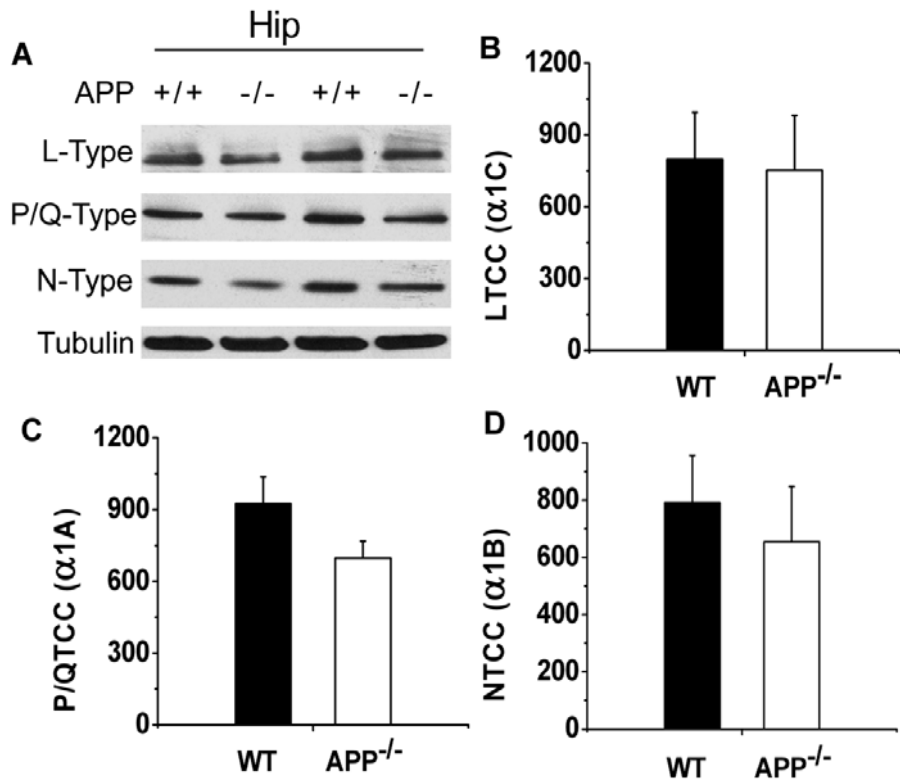

Figure S2. Similar LTCC, P/QTCC and NTCC expression levels in the APP<sup>-/-</sup> and WT hippocampus. A. Immunoblots of hippocampal extracts from 3 week-old APP<sup>-/-</sup> and WT littermates. The blots were probed with anti-α1C, α1A and α1B subunits antibodies representing LTCC, P/QTCC and NTCC, respectively. Anti-α-tubulin was used as loading control. Quantification of blots shown in A, revealing that no significant differences were found in the expression of LTCC (B), P/QTCC (C) and NTCC (D). Each value represents the mean ± SEM (N=3).

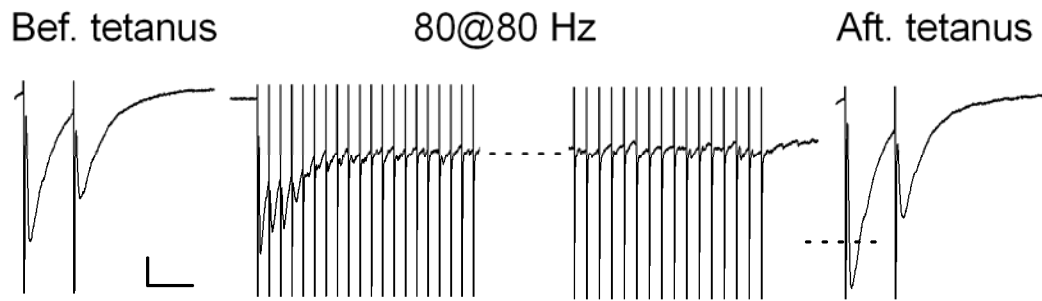

Figure S3. Induction of GABAergic PTP in WT hippocampal neurons by high frequency stimulation (1 sec at 80 Hz). IPSC1 amplitude increased  $29 \pm 5\%$  after tetanus compared to before tetanic control (N=3). Scales: 100 pA/50 msec.

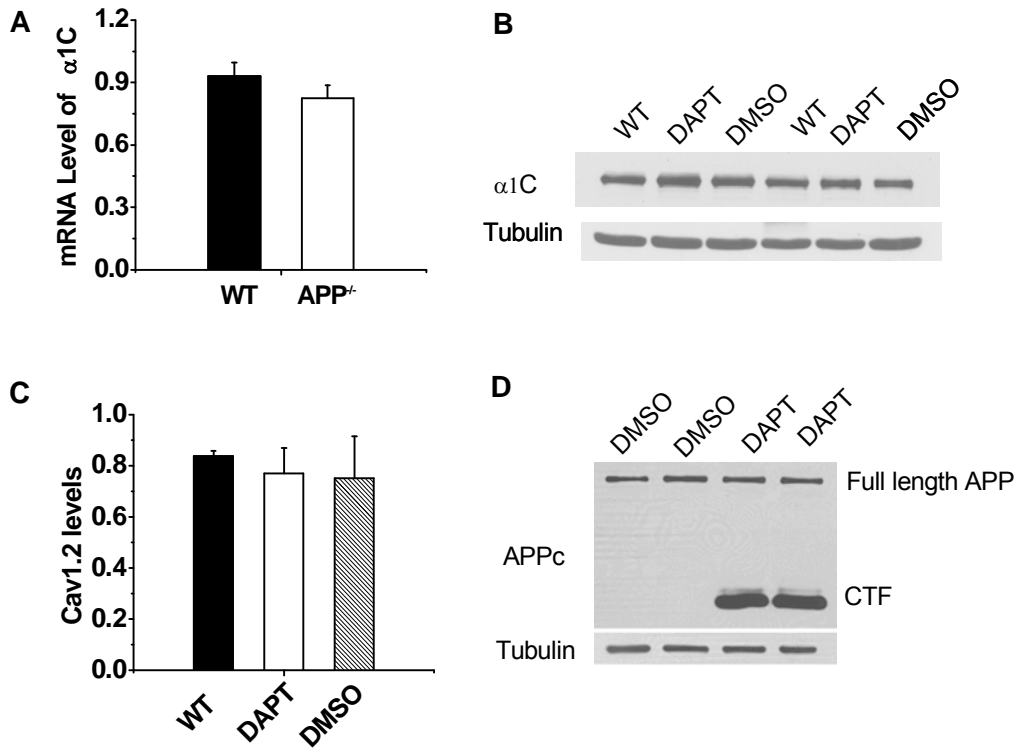

Figure S4. Similar  $\alpha$ 1C mRNA expression in WT and APP<sup>-/-</sup> striatum and unaffected  $\alpha$ 1C protein level by  $\gamma$ -secretase inhibitor. A. Quantitative RT-PCR analysis of  $\alpha$ 1C mRNA levels in wild-type and APP<sup>-/-</sup> striatum (values normalized to GAPDH control). B. Representative immunoblots of  $\alpha$ 1C protein from striatal cultures with or without  $\gamma$ -secretase inhibitor. WT: untreated; DAPT:  $\gamma$ -secretase inhibitor 1  $\mu$ M DAPT treated; DMSO: DMSO treated (vehicle control).  $\alpha$ -tubulin was used as loading control. C. Quantification of  $\alpha$ 1C/tubulin. Each value represents the mean  $\pm$  SEM (N=3). D. Accumulation of APP-CTF in the presence of 1  $\mu$ M DAPT, cleavage products of APP by  $\alpha$  and  $\beta$  secretases and the lack of  $\gamma$ -secretase activity.

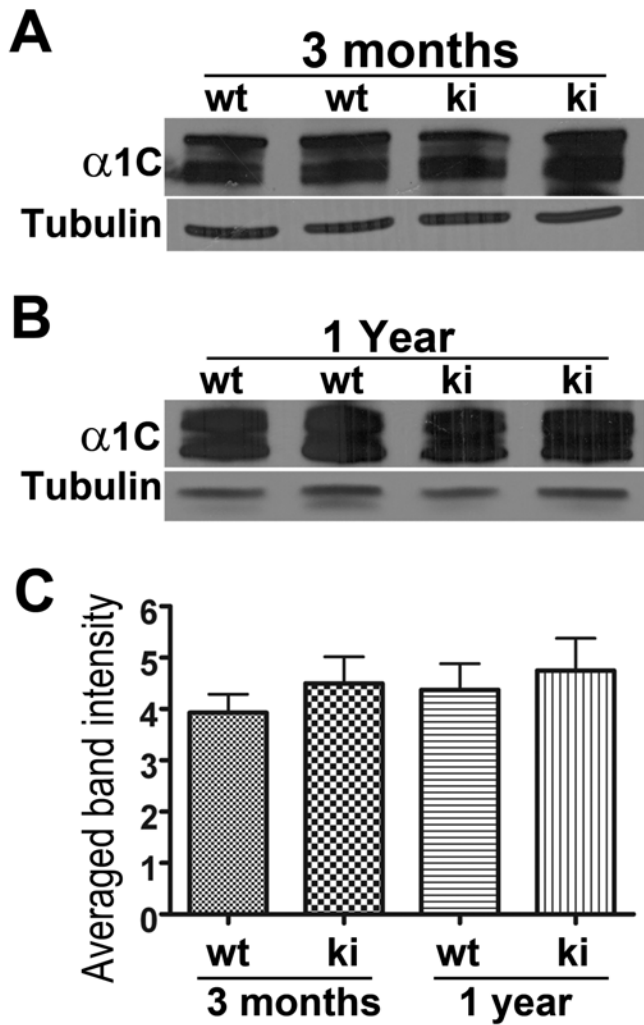

Figure S5. Indistinguishable  $Ca_v1.2$  levels in striatum of wild type (WT) and homozygous *APP* knock-in mice containing human  $A\beta$  sequence and the Swedish/London FAD mutations (ki). A and B. Immunoblots of striatal lysates from 3 months (A) and one year (B) old WT and ki mice probed with anti- $\alpha$ 1C antibody.  $\alpha$ -tubulin was used as loading control. C. Quantitative analysis of data (mean  $\pm$  SEM) in A and B.
